# American Neuropsychiatric Association

The American Neuropsychiatric Association (ANPA), established in 1988, is an organization of professionals in neuropsychiatry, behavioral neurology, neuropsychology and the clinical neurosciences. Our mission is to improve the lives of people with disorders at the interface of psychiatry and neurology through clinical care, education, advocacy and research.

The strength of the organization is our diversity of membership, which is comprised of professionals in neuropsychiatry, behavioral neurology, neuropsychology, neuroradiology, neuropathology, and neurosurgery as well as the basic neurosciences, who share clinical and/or academic interests in neuropsychiatry. The interdisciplinary nature of the membership encourages collaboration among educators, clinicians, researchers, students and trainees in research presentations, symposia, workshops and/or continuing education courses. *The Journal of Neuropsychiatry and Clinical Neurosciences (JNCN)* is the official publication of the organization, and is a benefit of membership.

ANPA holds an annual scientific meeting and provides up to 30 CME/CE credits. Members are encouraged to submit their work for presentation at these annual meetings. Travel awards are available for promising young investigators. Annual meeting abstracts and proceedings are published in *JNCN*.

ANPA has taken an active role in the creation of subspecialty certification for neuropsychiatry including developing a core curriculum and setting up guidelines for training in neuropsychiatry. As a result, Behavioral Neurology & Neuropsychiatry was approved as a subspecialty by the Unified Council for Neurologic Subspecialties (UCNS) in 2004.

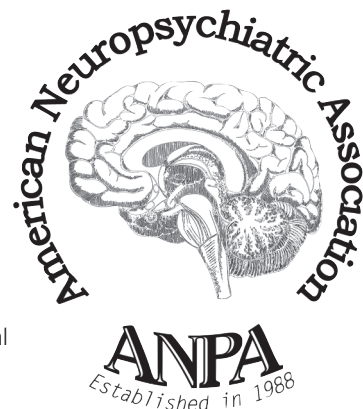

## Contact Information

### Benefits of Membership

- Subscription to *The Journal of Neuropsychiatry and Clinical Neurosciences (JNCN)*
- Discounted membership and meeting registration fees for trainees
- Collaboration in clinical, educational and research activities and the opportunity to interact with senior colleagues
- Opportunity to participate on committees and in the future leadership of ANPA
- Opportunity to participate in on-line forums for discussion of research, clinical cases and/or current issues related to neuropsychiatric practice
- Opportunity to join Special Interest Groups for members who have common interests in specific research, clinical cases, practice issues or educational areas
- Discount on subscriptions to PsychiatryOnline.com including DSM Premium and DSM Premium Plus
- Opportunity to participate on committees and in the future leadership of ANPA
- Opportunity to participate in on-line forums for discussion of research, clinical cases and/or current issues related to neuropsychiatric practice
- Opportunity to join Special Interest Groups for members who have common interests in specific research, clinical cases, practice issues or educational areas
- Opportunity for presentation at the annual meeting with accepted abstracts published in the *JNCN*
- Significantly reduced registration fees at the annual meeting
- Newsletters, news updates, information on job and training opportunities, research and meeting information on the ANPA web site: [www.anpaonline.org](http://www.anpaonline.org)

Website:  
[www.anpaonline.org](http://www.anpaonline.org)

Email:  
[anpa@osu.edu](mailto:anpa@osu.edu)

Phone:  
614-447-2077

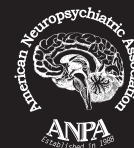

### Join ANPA Now!

**Don't miss ANPA's 21<sup>st</sup> Annual Meeting**  
**Tampa Marriott Waterside Hotel**  
**and Marina**  
**March 17 – 20, 2010**

# Tampa, Florida

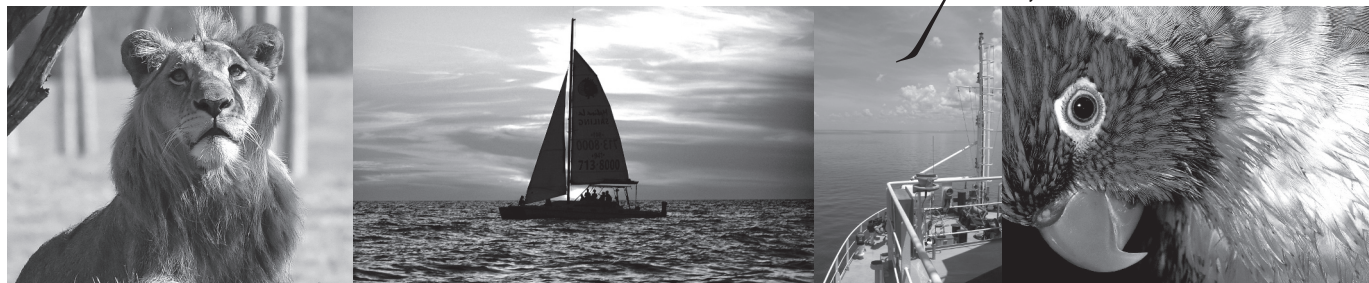

Join online at: <http://www.anpaonline.org/10117.cfm>

# American Neuropsychiatric Association

## 21<sup>st</sup> Annual Meeting

AND SOCIETY FOR BEHAVIORAL AND COGNITIVE NEUROLOGY ANNUAL SYMPOSIUM

The Marriott Tampa Waterside Hotel and Marina

March 17-20, 2010

Tampa  
Florida

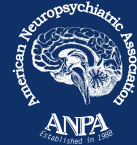

### JOINTLY SPONSORED BY:

The Ohio State University  
Medical Center and the American  
Neuropsychiatric Association

### WITH SPECIAL PARTICIPATION OF:

The International  
Neuropsychological Society and  
The Society for Behavioral and  
Cognitive Neurology

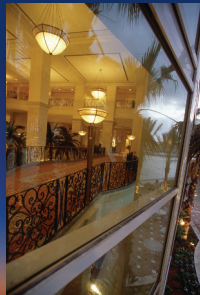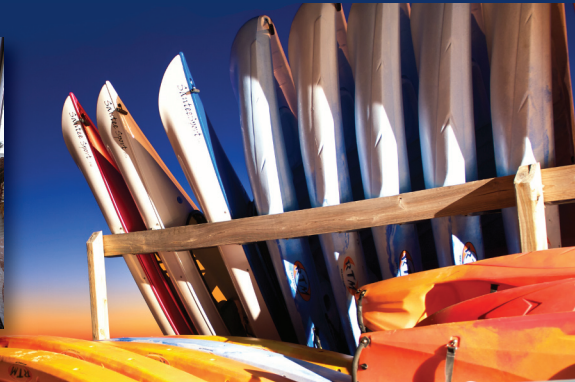

### ACCREDITATION

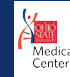

This activity has been planned and implemented in accordance with the Essential Areas and policies of the Accreditation Council for Continuing Medical Education through the joint sponsorship of The Ohio State University Medical Center, Center for Continuing Medical Education and the American Neuropsychiatric Association. The Ohio State University Medical Center, Center for Continuing Medical Education is accredited by the ACCME to provide continuing medical education for physicians.

The Ohio State University Medical Center designates this educational activity for a maximum of 28 AMA PRA Category 1 Credit(s)™.

Earn up to 28 CME credits for physicians and 28 CE credits for psychologists.

### WEDNESDAY, MARCH 17, 2010

#### ANPA WORKSHOP

##### ANTECEDENTS OF MENTAL ILLNESS:

THE DEVELOPMENT AND FUNCTIONAL ANATOMY  
OF THE CORTICO-LIMBIC SYSTEM

Chair: Robin A. Hurley, M.D., FANPA

##### ANTECEDENTS OF PEDIATRIC NEUROPSYCHIATRIC ILLNESS

Jay A. Salpekar, M.D.

##### ANTECEDENTS OF ADULT NEUROPSYCHIATRIC ILLNESS:

CORTICAL DEVELOPMENT

Albert H.C. Wong, M.D., Ph.D., FRCP(C)

#### SBCN SYMPOSIUM

NORMAL PRESSURE HYDROCEPHALUS:  
TAKING A WALK DOWN MEMORY LANE

Chair: Daniel I. Kaufer, M.D. FANPA  
Neill R. Graff-Radford, M.D.

### THURSDAY, MARCH 18, 2010

Presidential Welcome

Paula T. Trzepacz, M.D., FANPA

#### SUBMITTED CONCURRENT ORAL PRESENTATIONS

Research – Jeremy D. Schmahmann, M.D., FANPA  
Clinical – Sheldon Benjamin, M.D., FANPA

#### AN EVIDENCE-BASED REVIEW OF TREATMENT EFFICACY IN TIC DISORDERS AND TOURETTE SYNDROME: A REPORT OF THE ANPA COMMITTEE ON RESEARCH

Kevin J. Black, M.D., FANPA

Welcoming Remarks

Paula T. Trzepacz, M.D., FANPA, President  
Miles G. Cunningham, M.D., Ph.D., Chair, Scientific  
Program Committee

#### CNPA – PETER BASSOE KEYNOTE ADDRESS

GENES AND MENTAL ILLNESS: WHAT'S THE CONNECTION?  
Daniel R. Weinberger, M.D.

### FRIDAY, MARCH 19, 2010

#### PRESIDENTIAL SYMPOSIUM – NEUROCOGNITIVE DISORDERS IN DSM-V: NEUROPSYCHIATRIC, DSM AND REGULATORY PERSPECTIVES

Welcome and Introduction to Symposium

Paula T. Trzepacz, MD, FANPA  
Chair - David A. Silbersweig, M.D.

#### WHAT NEUROPSYCHIATRISTS WOULD LIKE TO SEE IN DSM-V

John J. Campbell, M.D., FANPA

#### BEHAVIORAL DISTURBANCES IN NEUROCOGNITIVE DISORDER IN DSM-V

Dilip V. Jeste, M.D., Ph.D.

#### DSM V NEUROCOGNITIVE DISORDERS: IMPLICATIONS FOR DEMENTIA AND MILD COGNITIVE IMPAIRMENT

Ronald C. Petersen, M.D., Ph.D.

#### HOW FDA APPROACHES NEUROCOGNITIVE DISORDERS IN THE PSYCHOPHARMACOLOGY DIVISION

Thomas P. Laughren, M.D.  
FDA Director of the Psychopharmacology Division

Panel Discussion and Q & A

Moderator – David Silbersweig, M.D.

#### LUNCHEON SPEAKER

A JOURNEY THROUGH MADNESS: THE LIFE AND LEGACY OF  
SIDNEY R. BAER

George B. Handran, Sidney R. Baer Foundation

#### THE NEUROPSYCHIATRY OF PSYCHOSIS

Chair: Francine Mary Benes, M.D., Ph.D.

#### THE REGULATION OF GABA CELL DIFFERENTIATION IN PSYCHOTIC DISORDERS: TO BE OR NOT TO BE?

Francine Benes, M.D., Ph.D.

#### OVERVIEW OF NEUROLOGICAL SIGNS OF PSYCHOSES

Matcheri S. Keshavan, M.D.

#### PSYCHOSIS AFTER TRAUMATIC BRAIN INJURY

Dr. Simon Fleming

#### POSTER SESSION

### SATURDAY, MARCH 20, 2010

#### SOCIAL AND MORAL COGNITION

Chair: Mario F. Mendez, M.D., Ph.D.

#### THE NEUROPSYCHIATRY OF SOCIOMORAL BEHAVIOR

Mario F. Mendez, M.D., Ph.D.

#### HUMAN DECISION MAKING: THE SOMATIC MARKER HYPOTHESIS: WITHSTANDING THE TEST OF TIME

Antoine Bechara, Ph.D.

#### SOCIAL BEHAVIOR AND FRONTOTEMPORAL DEMENTIA

Katherine P. Rankin, Ph.D.

#### NEURAL CIRCUITS SUBSERVING EMPATHY AND SYMPATHY IN TYPICALLY DEVELOPING CHILDREN AND CHILDREN WITH SOCIAL BEHAVIOR DISORDERS

Jean Decety, Ph.D.

#### ROLE AND MECHANISM OF ANTIDEPRESSANTS ON MORTALITY AND RECOVERY FROM STROKE

Chair: Robert G. Robinson, M.D.

#### THE ROLE OF ANTIDEPRESSANTS IN POST-STROKE MORTALITY

Robert G. Robinson, M.D.

#### THE ASSOCIATION OF CYTOKINES AND INFLAMMATORY MARKERS IN POST-STROKE DEPRESSION

Gianfranco Spalletta, M.D.

#### THE ROLE OF ANTIDEPRESSANTS IN COGNITIVE RECOVERY FOLLOWING STROKE

Ricardo Jorge, M.D.

#### THE ROLE OF ANTIDEPRESSANTS IN PHYSICAL RECOVERY FOLLOWING STROKE

Ellen Whyte, M.D.

Discussant - Robert Robinson, M.D.

Annual Banquet

Award Presentations

Presidential Address

Paula T. Trzepacz, M.D., FANPA

If you have any questions about the meeting or for general information about ANPA, please contact Sandy Bornstein at the ANPA Office.

American Neuropsychiatric Association  
700 Ackerman Rd, Suite 625  
Columbus, OH 43202

Phone: 614-447-2077 • Fax: 614-263-4366  
E-mail: [anpa@osu.edu](mailto:anpa@osu.edu) • Web Site:  
[www.anpaonline.org](http://www.anpaonline.org)

Meeting details and Online Registration available at: [www.anpaonline.org](http://www.anpaonline.org)
