# THE JOURNAL OF NEUROPSYCHIATRY and Clinical Neurosciences

The Official Journal of the American Neuropsychiatric Association

## In this issue:

- Psychopharmacological Neuroprotection in Neurodegenerative Disease: Assessing the Preclinical Data
- Frontotemporal Dementia and Pharmacologic Interventions
- Pediatric Stroke: Plasticity, Vulnerability, and Age of Lesion Onset
- Consequences of Aggressive Behavior in Patients With Dementia
- Neuropsychological Outcomes of Older Breast Cancer Survivors: Cognitive Features Ten or More Years After Chemotherapy

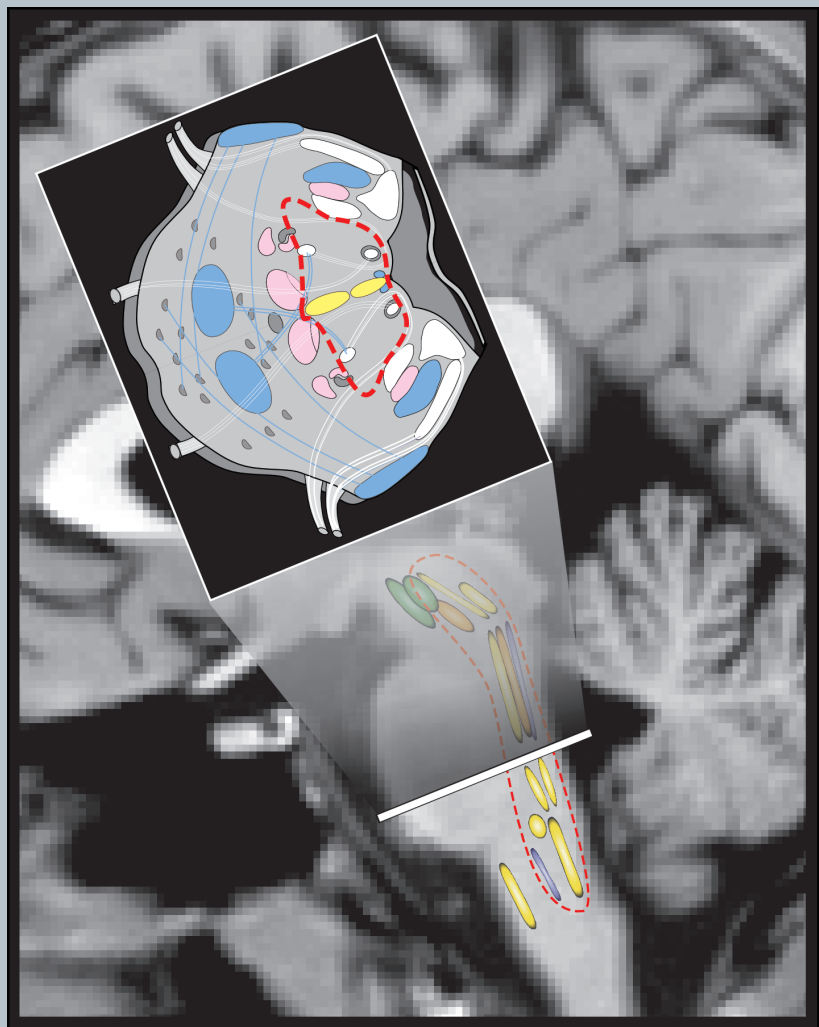

Source: https://neuro.psychiatryonline.org/doi/suppl/10.1176/jnp.2010.22.issue-1/suppl_file/cover.pdf
